# Supplementary material
Source: publisher site journal article supplement (http://content.karger.com/ProdukteDB/miscArchiv/000/160/215/Suppl_Table.pdf)
Supplement: Supplementary file 1 [file Suppl_Table.pdf]

**Supplemental Table: List of 96 ancestry informative markers (AIMs) selected for Latinos**

identified from genotyping three ancestral populations (37 West Africans, 42 European

Caucasians, and 30 Native Americans) on the Affymetrix GeneChip Human Mapping 100K

array.[12]

| <b>Chromosome</b> | <b>Marker Name</b> | <b>AFR allele freq</b> | <b>EUR allele freq</b> | <b>NA allele freq</b> | <b>AFR - EUR Delta</b> | <b>AFR - NA Delta</b> | <b>EUR - NA Delta</b> |
|-------------------|--------------------|------------------------|------------------------|-----------------------|------------------------|-----------------------|-----------------------|
| 1                 | rs9286859*         | 0.421                  | 0.881                  | 0.067                 | 0.460                  | 0.354                 | 0.814                 |
| 1                 | rs10908348         | 0.842                  | 0.048                  | 0.000                 | 0.794                  | 0.842                 | 0.048                 |
| 1                 | rs520982           | 0.111                  | 0.905                  | 0.833                 | 0.794                  | 0.722                 | 0.071                 |
| 1                 | rs2335405          | 0.079                  | 0.571                  | 0.967                 | 0.492                  | 0.888                 | 0.395                 |
| 1                 | rs4662179          | 1.000                  | 0.929                  | 0.167                 | 0.071                  | 0.833                 | 0.762                 |
| 1                 | rs1538043*         | 0.111                  | 0.857                  | 1.000                 | 0.746                  | 0.889                 | 0.143                 |
| 1                 | rs10495441*        | 0.526                  | 0.048                  | 0.767                 | 0.479                  | 0.240                 | 0.719                 |
| 2                 | rs10490014         | 0.947                  | 0.119                  | 0.333                 | 0.828                  | 0.614                 | 0.214                 |
| 2                 | rs10496035         | 0.079                  | 0.833                  | 0.333                 | 0.754                  | 0.254                 | 0.500                 |
| 2                 | rs6716602          | 0.147                  | 0.905                  | 0.833                 | 0.758                  | 0.686                 | 0.071                 |
| 2                 | rs9306855          | 0.132                  | 0.619                  | 1.000                 | 0.487                  | 0.868                 | 0.381                 |
| 2                 | rs2381203          | 0.947                  | 0.405                  | 0.067                 | 0.543                  | 0.881                 | 0.338                 |
| 2                 | rs1366840          | 0.000                  | 0.500                  | 0.900                 | 0.500                  | 0.900                 | 0.400                 |
| 2                 | rs1517634          | 0.974                  | 0.700                  | 0.067                 | 0.274                  | 0.907                 | 0.633                 |
| 2                 | rs356652           | 1.000                  | 0.881                  | 0.167                 | 0.119                  | 0.833                 | 0.714                 |
| 2                 | rs1437660          | 0.974                  | 0.190                  | 0.900                 | 0.783                  | 0.074                 | 0.710                 |
| 3                 | rs1989180*         | 0.868                  | 0.071                  | 0.000                 | 0.797                  | 0.868                 | 0.071                 |
| 3                 | rs10510726         | 0.789                  | 0.000                  | 0.000                 | 0.789                  | 0.789                 | 0.000                 |
| 3                 | rs1806558          | 0.026                  | 0.786                  | 0.233                 | 0.759                  | 0.207                 | 0.552                 |
| 3                 | rs4687010          | 0.895                  | 0.048                  | 0.033                 | 0.847                  | 0.861                 | 0.014                 |
| 3                 | rs2306522          | 0.059                  | 0.406                  | 0.967                 | 0.347                  | 0.908                 | 0.560                 |
| 3                 | rs2256194          | 0.105                  | 0.643                  | 1.000                 | 0.538                  | 0.895                 | 0.357                 |
| 3                 | rs10510302         | 0.684                  | 0.929                  | 0.133                 | 0.244                  | 0.551                 | 0.795                 |
| 3                 | rs2317212          | 0.711                  | 0.143                  | 0.867                 | 0.568                  | 0.156                 | 0.724                 |
| 3                 | rs4686997          | 0.132                  | 0.190                  | 0.900                 | 0.059                  | 0.768                 | 0.710                 |
| 4                 | rs10517290*        | 0.921                  | 0.071                  | 0.267                 | 0.850                  | 0.654                 | 0.195                 |
| 4                 | rs6847612          | 0.053                  | 0.643                  | 0.967                 | 0.590                  | 0.914                 | 0.324                 |
| 4                 | rs10517749         | 1.000                  | 0.452                  | 0.133                 | 0.548                  | 0.867                 | 0.319                 |
| 4                 | rs10517243         | 0.412                  | 0.048                  | 0.767                 | 0.364                  | 0.355                 | 0.719                 |
| 4                 | rs1921884          | 0.421                  | 0.810                  | 0.100                 | 0.388                  | 0.321                 | 0.710                 |
| 4                 | rs2099365          | 0.353                  | 0.026                  | 0.733                 | 0.327                  | 0.380                 | 0.707                 |
| 5                 | rs6861029*         | 0.921                  | 0.200                  | 0.000                 | 0.721                  | 0.921                 | 0.200                 |
| 5                 | rs6877794          | 0.038                  | 0.861                  | 0.231                 | 0.823                  | 0.192                 | 0.630                 |
| 5                 | rs9284966          | 0.194                  | 0.976                  | 0.933                 | 0.782                  | 0.739                 | 0.043                 |
| 5                 | rs2311735          | 0.289                  | 0.262                  | 0.967                 | 0.028                  | 0.677                 | 0.705                 |
| 5                 | rs9329079          | 0.658                  | 0.810                  | 0.033                 | 0.152                  | 0.625                 | 0.776                 |

|    |             |       |       |       |       |       |       |
|----|-------------|-------|-------|-------|-------|-------|-------|
| 5  | rs3776597*  | 0.789 | 0.024 | 0.167 | 0.766 | 0.623 | 0.143 |
| 6  | rs1028572   | 0.132 | 0.944 | 0.714 | 0.813 | 0.583 | 0.230 |
| 6  | rs1334601   | 0.868 | 0.095 | 0.033 | 0.773 | 0.835 | 0.062 |
| 6  | rs1570843   | 0.947 | 0.190 | 0.567 | 0.757 | 0.381 | 0.376 |
| 6  | rs860751    | 0.132 | 0.905 | 0.900 | 0.773 | 0.768 | 0.005 |
| 6  | rs205262    | 0.868 | 0.310 | 0.000 | 0.559 | 0.868 | 0.310 |
| 6  | rs1462475   | 0.579 | 0.262 | 0.967 | 0.317 | 0.388 | 0.705 |
| 6  | rs2670375*  | 0.105 | 0.738 | 1.000 | 0.633 | 0.895 | 0.262 |
| 7  | rs6959905*  | 0.158 | 0.929 | 0.700 | 0.771 | 0.542 | 0.229 |
| 7  | rs1404966   | 0.132 | 0.905 | 0.800 | 0.773 | 0.668 | 0.105 |
| 7  | rs156429    | 0.088 | 0.643 | 0.967 | 0.555 | 0.878 | 0.324 |
| 7  | rs661079    | 0.868 | 0.214 | 0.000 | 0.654 | 0.868 | 0.214 |
| 7  | rs6976891   | 0.132 | 0.119 | 0.833 | 0.013 | 0.702 | 0.714 |
| 7  | rs4947673   | 0.750 | 0.842 | 0.133 | 0.092 | 0.617 | 0.709 |
| 8  | rs4291261   | 0.947 | 0.071 | 0.133 | 0.876 | 0.814 | 0.062 |
| 8  | rs7836147   | 0.184 | 1.000 | 1.000 | 0.816 | 0.816 | 0.000 |
| 8  | rs9298108   | 0.947 | 0.190 | 0.033 | 0.757 | 0.914 | 0.157 |
| 9  | rs590086    | 0.842 | 0.048 | 0.033 | 0.794 | 0.809 | 0.014 |
| 9  | rs7847028   | 0.921 | 0.143 | 0.633 | 0.778 | 0.288 | 0.490 |
| 9  | rs1500318   | 0.118 | 0.905 | 1.000 | 0.787 | 0.882 | 0.095 |
| 9  | rs9314709   | 0.974 | 0.738 | 0.033 | 0.236 | 0.940 | 0.705 |
| 9  | rs4741013   | 0.895 | 1.000 | 0.267 | 0.105 | 0.628 | 0.733 |
| 9  | rs2891189   | 0.632 | 0.810 | 0.107 | 0.178 | 0.524 | 0.702 |
| 10 | rs7921261*  | 0.125 | 0.976 | 1.000 | 0.851 | 0.875 | 0.024 |
| 10 | rs816627    | 0.895 | 0.048 | 0.267 | 0.847 | 0.628 | 0.219 |
| 10 | rs10508349  | 0.000 | 0.000 | 0.767 | 0.000 | 0.767 | 0.767 |
| 10 | rs3808943   | 0.895 | 1.000 | 0.167 | 0.105 | 0.728 | 0.833 |
| 11 | rs1487214   | 0.842 | 0.048 | 0.200 | 0.794 | 0.642 | 0.152 |
| 11 | rs7127539   | 0.947 | 0.143 | 0.633 | 0.805 | 0.314 | 0.490 |
| 11 | rs666899    | 0.053 | 0.595 | 0.933 | 0.543 | 0.881 | 0.338 |
| 11 | rs1533224   | 0.026 | 0.143 | 0.967 | 0.117 | 0.940 | 0.824 |
| 11 | rs10501992* | 0.132 | 0.095 | 0.833 | 0.036 | 0.702 | 0.738 |
| 12 | rs10734822  | 0.219 | 1.000 | 1.000 | 0.781 | 0.781 | 0.000 |
| 12 | rs4762106   | 0.912 | 0.143 | 0.700 | 0.769 | 0.212 | 0.557 |
| 12 | rs2287538   | 0.947 | 0.690 | 0.067 | 0.257 | 0.881 | 0.624 |
| 12 | rs7310151   | 0.056 | 0.810 | 0.933 | 0.754 | 0.878 | 0.124 |
| 12 | rs3803088   | 1.000 | 0.476 | 0.100 | 0.524 | 0.900 | 0.376 |
| 12 | rs1298913   | 0.053 | 0.190 | 0.900 | 0.138 | 0.847 | 0.710 |
| 13 | rs1360348   | 0.132 | 0.929 | 0.600 | 0.797 | 0.468 | 0.329 |
| 13 | rs1885894   | 0.947 | 0.190 | 0.433 | 0.757 | 0.514 | 0.243 |
| 13 | rs831223    | 0.889 | 0.071 | 0.033 | 0.817 | 0.856 | 0.038 |
| 13 | rs959745    | 0.921 | 0.214 | 0.000 | 0.707 | 0.921 | 0.214 |
| 14 | rs2357442   | 0.842 | 0.905 | 0.133 | 0.063 | 0.709 | 0.771 |
| 15 | rs638169    | 0.167 | 0.976 | 0.967 | 0.810 | 0.800 | 0.010 |
| 15 | rs970254    | 0.941 | 0.238 | 0.067 | 0.703 | 0.875 | 0.171 |
| 15 | rs10520735  | 0.974 | 0.262 | 0.967 | 0.712 | 0.007 | 0.705 |
| 16 | rs437620    | 0.579 | 0.810 | 0.100 | 0.231 | 0.479 | 0.710 |
| 17 | rs1478785   | 0.026 | 0.810 | 0.800 | 0.783 | 0.774 | 0.010 |
| 17 | rs2303506   | 0.105 | 0.881 | 0.714 | 0.776 | 0.609 | 0.167 |
| 17 | rs2107441   | 0.412 | 0.786 | 0.000 | 0.374 | 0.412 | 0.786 |

|    |            |       |       |       |       |       |       |
|----|------------|-------|-------|-------|-------|-------|-------|
| 18 | rs2306514  | 0.132 | 0.690 | 1.000 | 0.559 | 0.868 | 0.310 |
| 18 | rs12953952 | 0.056 | 0.925 | 1.000 | 0.869 | 0.944 | 0.075 |
| 18 | rs3813127  | 0.053 | 0.214 | 0.933 | 0.162 | 0.881 | 0.719 |
| 18 | rs2133094  | 0.105 | 0.190 | 0.933 | 0.085 | 0.828 | 0.743 |
| 19 | rs289332   | 0.139 | 0.643 | 1.000 | 0.504 | 0.861 | 0.357 |
| 20 | rs2023385  | 0.184 | 1.000 | 0.700 | 0.816 | 0.516 | 0.300 |
| 20 | rs6023367  | 0.933 | 0.143 | 0.033 | 0.790 | 0.900 | 0.110 |
| 21 | rs2837369  | 0.316 | 0.762 | 0.033 | 0.446 | 0.282 | 0.729 |
| 21 | rs2823893* | 0.132 | 1.000 | 1.000 | 0.868 | 0.868 | 0.000 |
| 21 | rs2037916* | 1.000 | 0.714 | 0.100 | 0.286 | 0.900 | 0.614 |

Delta is the absolute value of the difference in allele frequency between specified population 1 and population 2. It can take a range between 0 (completely uninformative) to 1 (completely informative).

AFR=African, EUR=European, NA=Native American. \* Marker excluded from analysis either because failed multiplex genotyping or monomorphic in our population.
